# Supplementary material
Source: PubMed Central journal article supplement (PMC7301590)
Supplement: ao0c01342_si_001.pdf [file ao0c01342_si_001.pdf]

## Supporting Information

### Synthesis and Biological Evaluation of Three New Chitosan Schiff Base

#### Derivatives

Nadia Q. Haj<sup>a</sup>, Mohsin O. Mohammed,<sup>b\*</sup> Loqman E. Mohammood<sup>c</sup>

<sup>a</sup> University of Kirkuk, College of Science, Chemistry Department, 009641, Kirkuk, Iraq.

<sup>b</sup> University of Kirkuk, College of Agriculture, Basic Science Department, 009641, Kirkuk, Iraq.

<sup>c</sup> University of Kirkuk, College of Pharmacy, Chemistry Department, 009641, Kirkuk, Iraq.

**Table S1:** shows the details for the treatment of C<sub>1</sub>, C<sub>2</sub>, C<sub>3</sub>, and C<sub>4</sub>

| SAMPLE         | PROCESS          | TREATMENT/ DESCRIPTION                                                                                                                                                                                                                                                                                     |
|----------------|------------------|------------------------------------------------------------------------------------------------------------------------------------------------------------------------------------------------------------------------------------------------------------------------------------------------------------|
| C <sub>1</sub> |                  | The fish scales were washed and grinded into the powder form. The powder was treated with hot ethanol (50 - 60 °C) to kill germs and remove pungent odour. The resulting sample (designated as C <sub>1</sub> ) was washed with ample amount of water and subjected to freeze-drying.                      |
| C <sub>2</sub> | Demineralization | HCl (5 %) was added slowly to the powder to remove CaCO <sub>3</sub> component with volume to sample ratio 5:1. The reaction mixture was stirred for 3 hrs. After that, the powder was washed with ample amount of water until pH is neutral; 10g of samples is collected and labelled as C <sub>2</sub> . |
| C <sub>3</sub> | Deproteinization | NaOH (10 %) was added to denature the powder and remove the protein at 60 °C with volume to sample ratio 5:1. The mixture was stirred for 3 hours. After that, the powder was washed with ample amount of water until pH is neutral; 10g of samples is collected and labelled as C <sub>3</sub> .          |
| C <sub>4</sub> | Deacetylation    | NaOH (50 %) was added to deacetylate the chitin into chitosan with volume to sample ratio 5:1. The mixture was treated under reflux condition for 3 hours. After that, the powder was washed with ample amount of water until pH is neutral; 10g of samples is collected and labelled as C <sub>4</sub> .  |

\*Corresponding author. Phone: +9647701307283. E-mail addresses: althker1@uokirkuk.edu.iq, orcid: <https://orcid.org/0000-0001-5341-9727>

**Table S2:** illustrate the characteristic by the Acid-base titration method of standard and experimentally prepared chitosan

| Sample         | W      | C <sub>1</sub> / M | V <sub>1</sub> / mL | C <sub>2</sub> / M | V <sub>2</sub> / mL | (-NH <sub>2</sub> ) | DD%   |
|----------------|--------|--------------------|---------------------|--------------------|---------------------|---------------------|-------|
| C <sub>4</sub> | 0.2909 | 0.1                | 30.00               | 0.1                | 19.6                | 0.0555              | 65.50 |
| Chitin         | 0.3001 | 0.1                | 30.00               | 0.1                | 29.8                | 0.0011              | 2.09  |
| Chitosan       | 0.2998 | 0.1                | 30.00               | 0.1                | 12.2                | 0.0949              | 96.10 |

**Table S3:** shows the characteristic absorption bands in the FT-IR spectra of standard and experimentally prepared chitosan

| Wavenumber / cm <sup>-1</sup> |                    |                    |                    | Vibration Mode                                                                |
|-------------------------------|--------------------|--------------------|--------------------|-------------------------------------------------------------------------------|
| Chitin                        |                    | Chitosan           |                    |                                                                               |
| Chitin                        | C3                 | Chitosan           | C <sub>4</sub>     |                                                                               |
| 3441                          | 3446               | 3437               | 3441               | v(NH <sub>2</sub> ) assoc. in primary amines<br>v(OH) assoc. in pyranose ring |
| 3112                          | 3107               | 2874               | 2958               | v <sub>as</sub> (CH <sub>2</sub> ) in CH2OH group                             |
| 2891                          | 2891               | -                  | 2887               | v(C-H) in pyranose ring                                                       |
| 1655<br>(Shoulder)            | 1655<br>(Shoulder) | 1602<br>(Shoulder) | 1627<br>(Shoulder) | v(C=O) in NHCOCH <sub>3</sub> group<br>(Amide I band)                         |
| 1416                          | 1419               | 1421               | 1414               | δ(CH <sub>2</sub> ) in the CH <sub>2</sub> OH group                           |
| 1382                          | 1382               | 1383               | 1383               | δ <sub>s</sub> (CH <sub>3</sub> ) in NHCOCH <sub>3</sub> group                |
| 1316                          | 1316               | 1324               | 1316               | δ(C-H) in pyranose ring                                                       |
| 1264                          | 1261               | 1259               | 1261               | Complex vibrations of NHCO group<br>(Amide III band)                          |
| 1157                          | 1157               | 1156               | 1157               | v <sub>as</sub> (C-O-C) (glycosidic linkage)                                  |
| 1074                          | 1075               | 1078               | 1075               | v <sub>as</sub> (C-O-C) (glycosidic linkage)                                  |
| 1026                          | 1024               | 1029               | 1024               | v(C-O) in secondary OH group                                                  |
| 953                           | 953                | -                  | 954                | v(C-O) in primary OH group                                                    |
| 896                           | 896                | 895                | 896                | Pyranose ring skeletal vibrations                                             |
| 695                           | 596                | 663                | 617                | δ(NH) out of plane                                                            |
| 598                           | 527                | 578                | 529                | δ(OH) out of a plane                                                          |

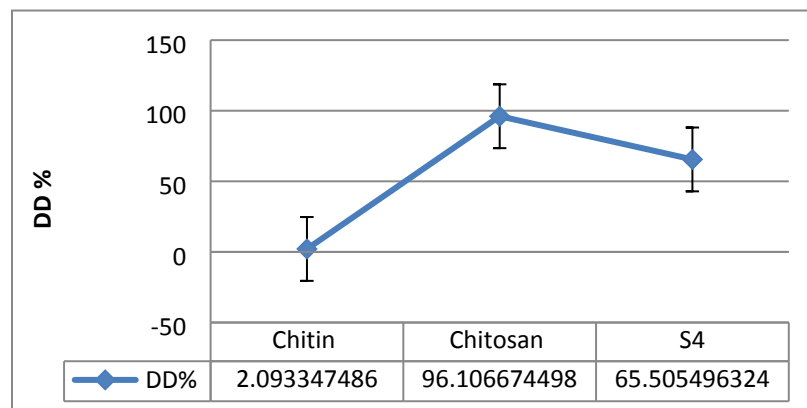

**Figure S1:** DD % of S<sub>4</sub>, chitin and chitosan samples

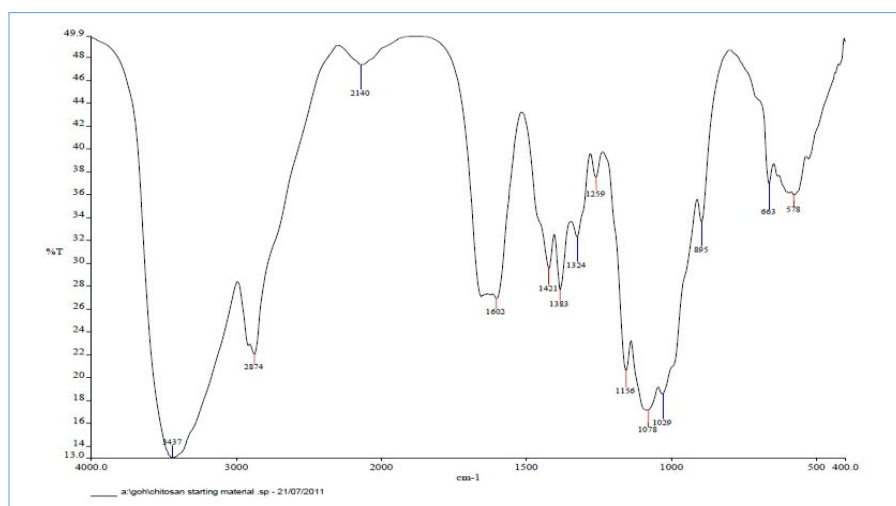

**Figure S2:** FT-IR spectrum of CS (Amrec Sirim; DD %=96.10 %)

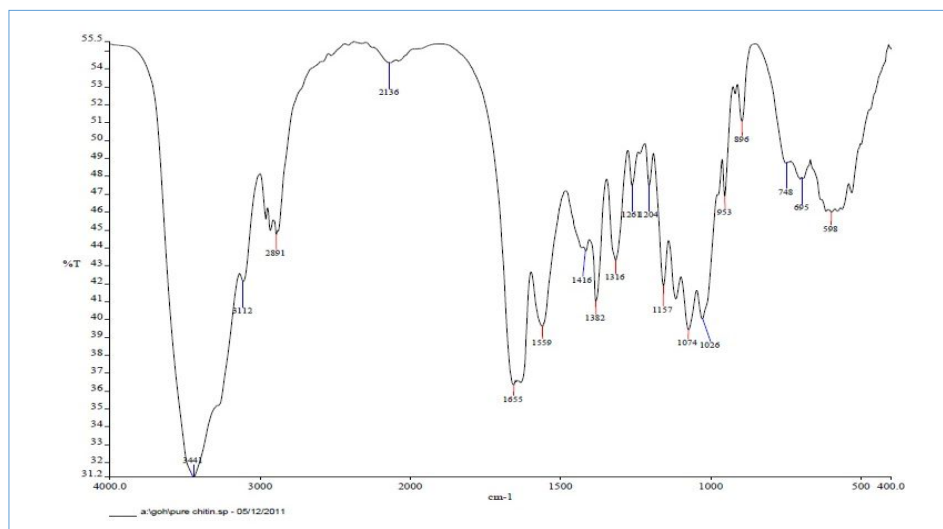

**Figure S3:** FT-IR spectrum of CH (Himedia; DD %=2.09%)

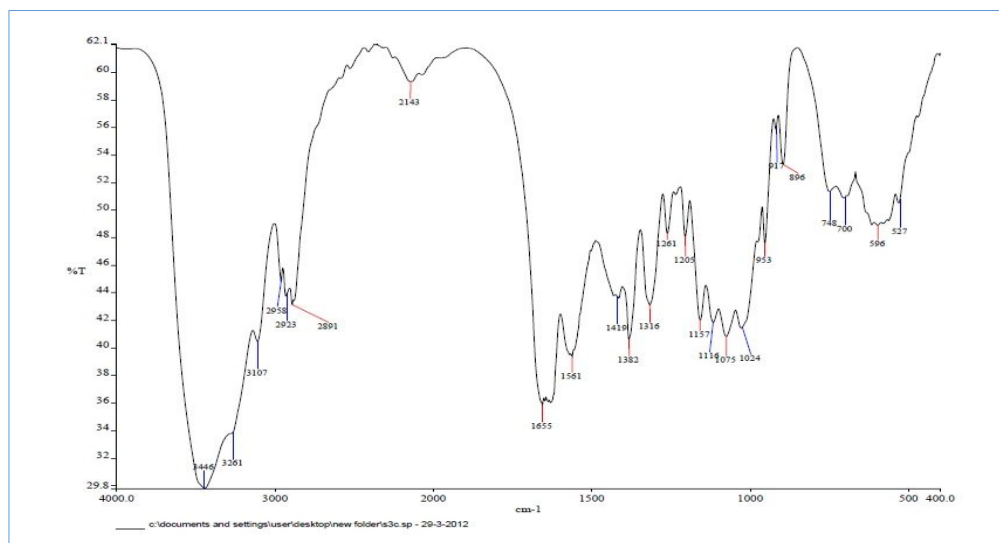

**Figure S4:** Shows the FT-IR spectrum of C<sub>3</sub>

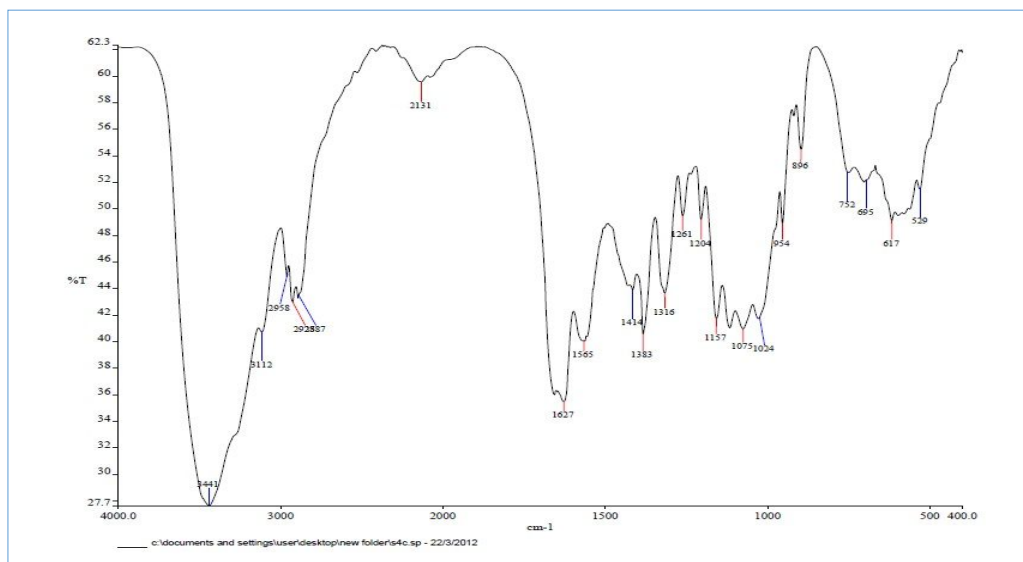

**Figure S5:** FT-IR spectrum of C<sub>4</sub> (DD %=65.50 %)

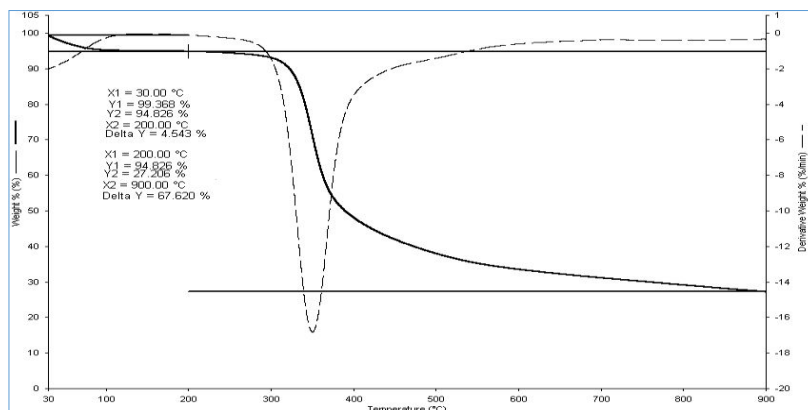

**Figure S6:** TG and DTG plots of CS (Amrec Sirim; DD %=96.10 %)

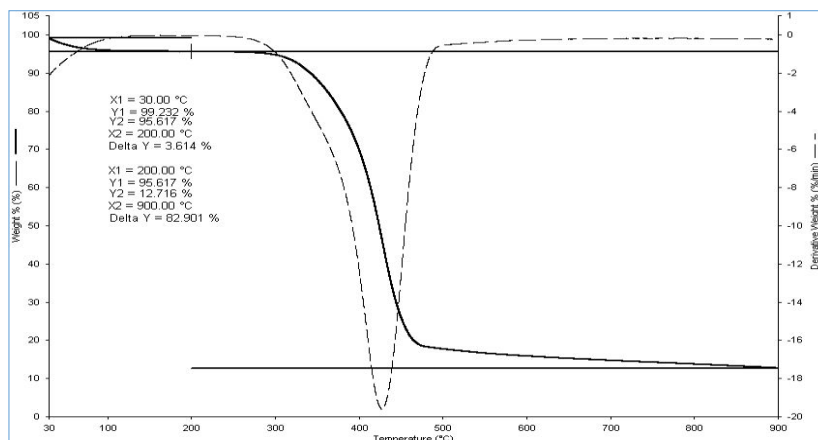

**Figure S7:** TG and DTG plots of CH (HiMedia; DD %=2.09%)

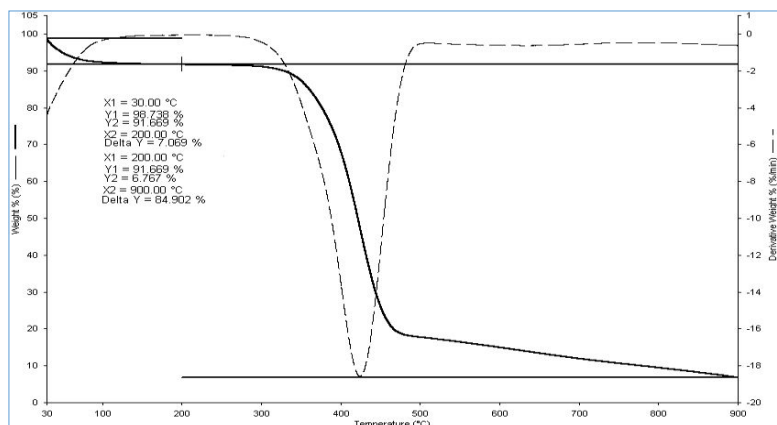

**Figure S8:** TG and DTG plots of C<sub>3</sub>

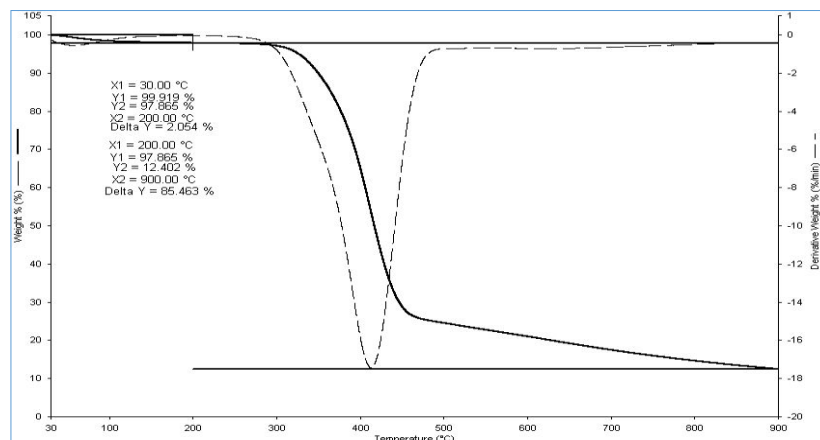

**Figure S9:** TG and DTG plots of C<sub>4</sub> (DD %=65.50 %)

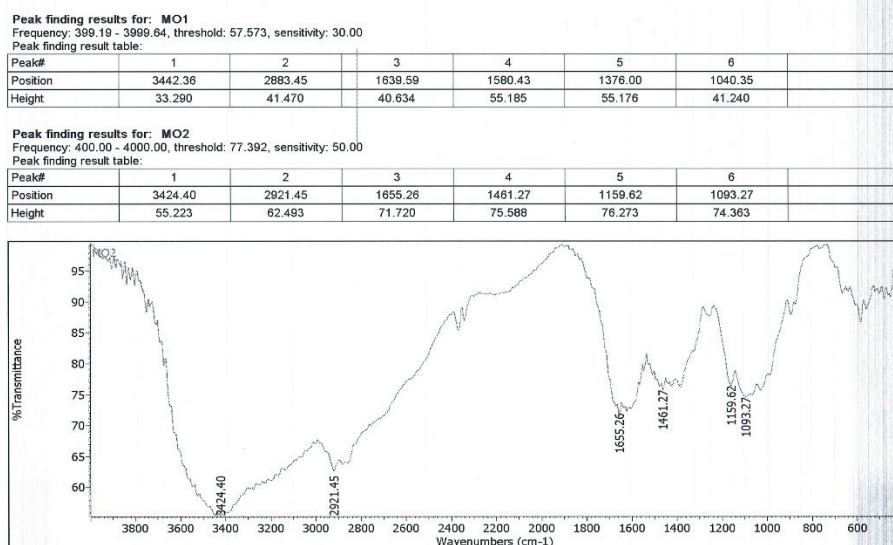

**Figure S10:** FT-IR spectrum of CS-P1

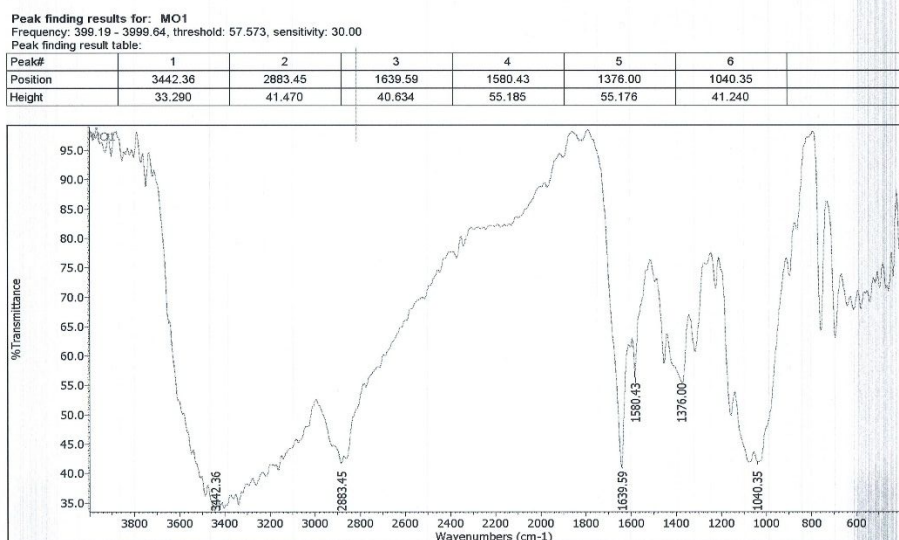

**Figure S11:** FT-IR spectrum of CS-P2

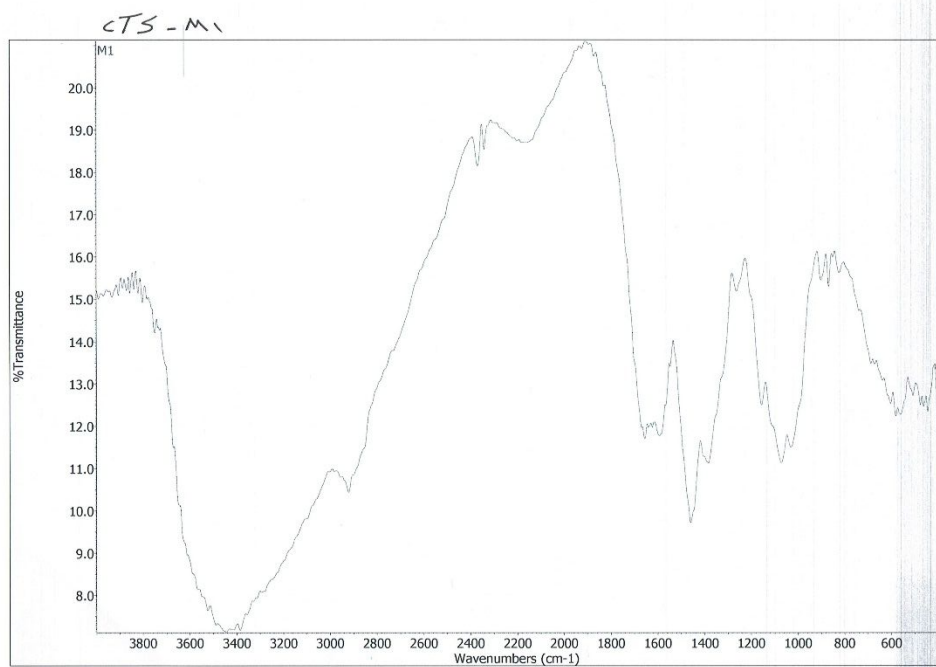

**Figure S12:** FT-IR spectrum of CS-P3

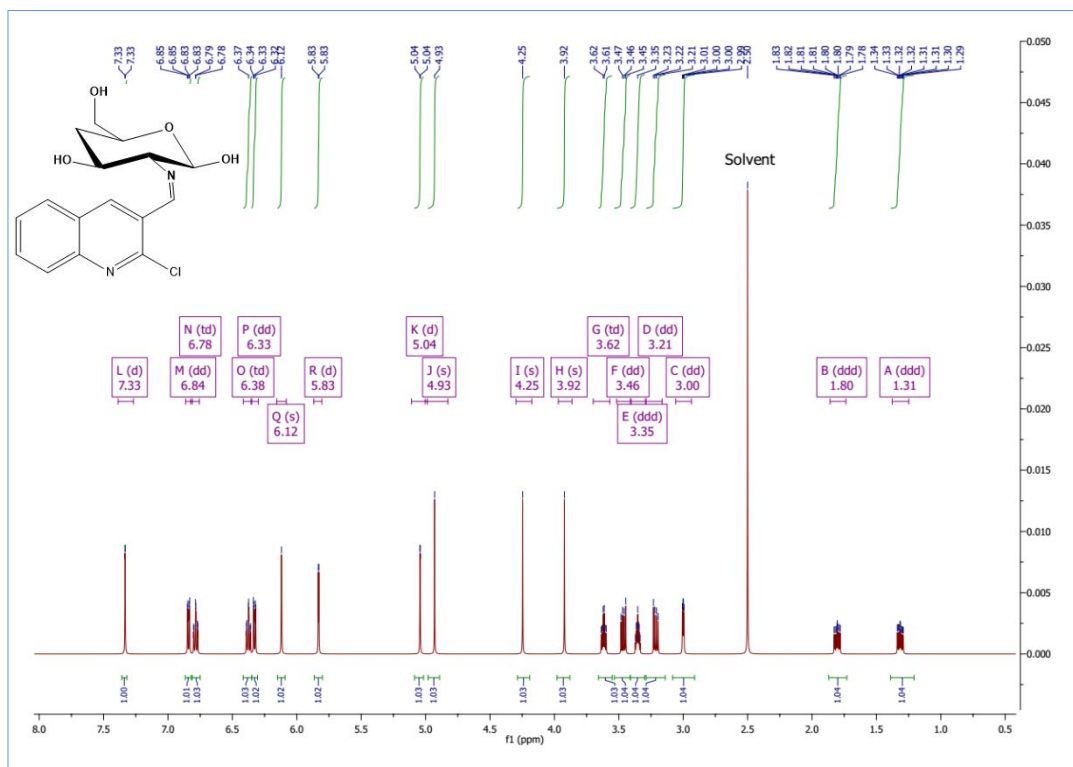

**Figure S13:** <sup>1</sup>H NMR form compound CS-P1

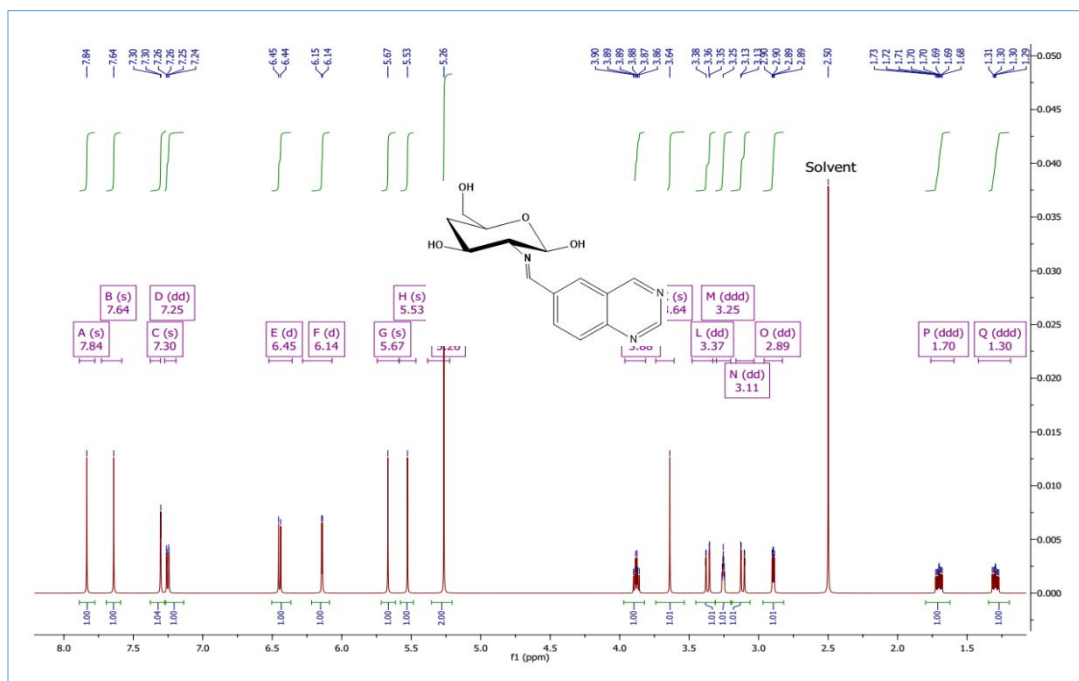

**Figure S14:** <sup>1</sup>H NMR form compound CS-P2

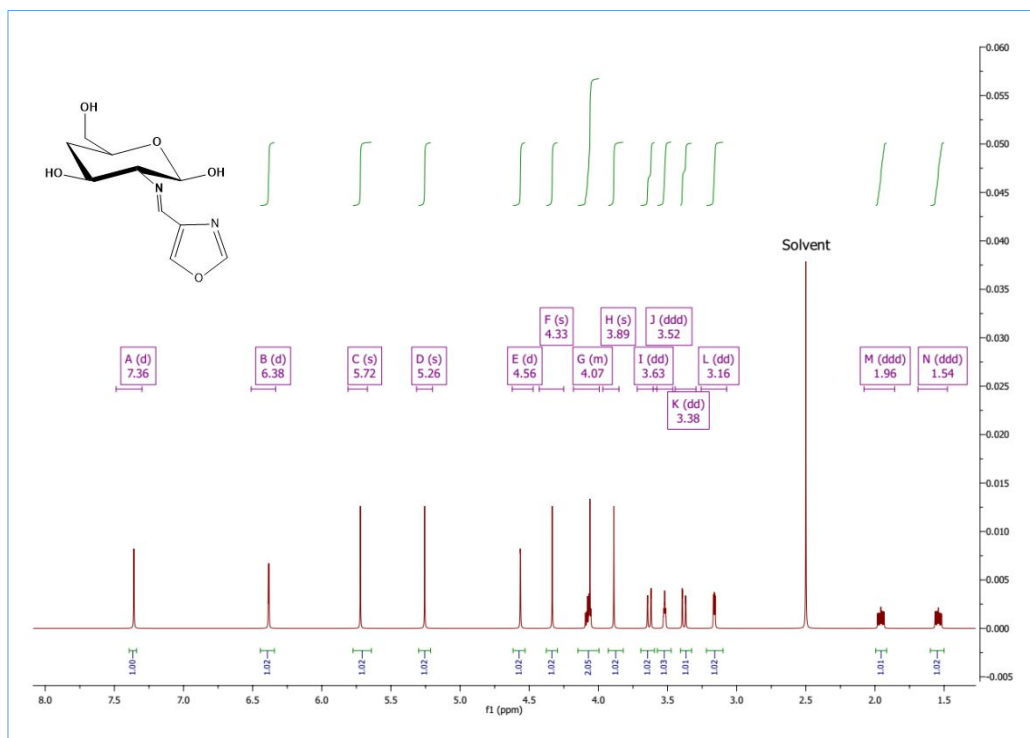

**Figure S15:** <sup>1</sup>H NMR form compound CS-P3

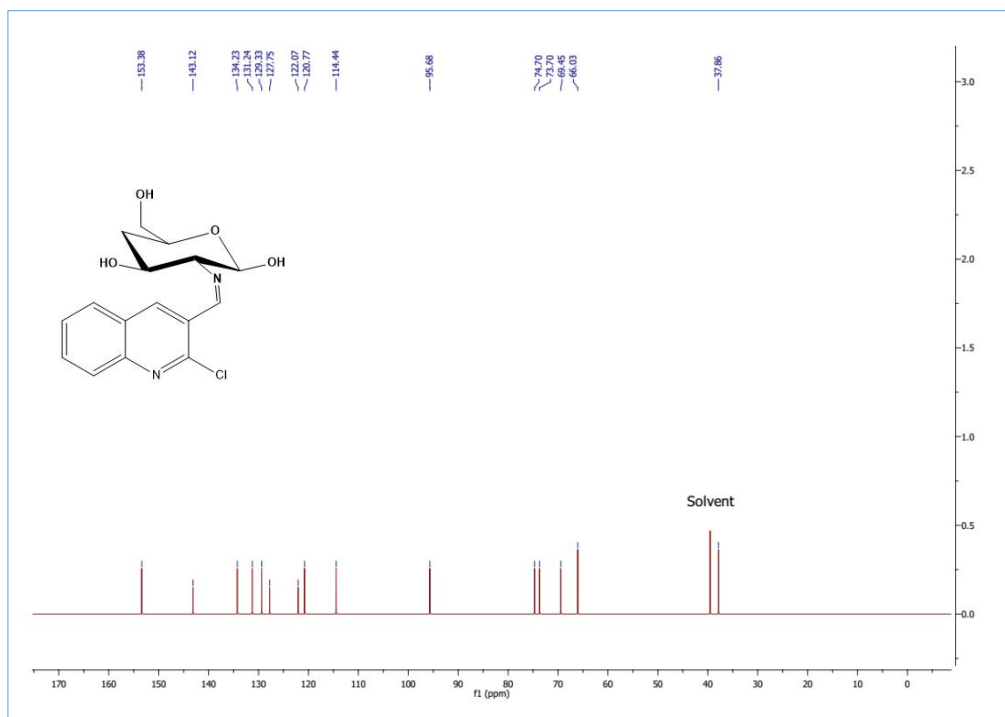

**Figure S16:** <sup>13</sup>C NMR form compound CS-P1

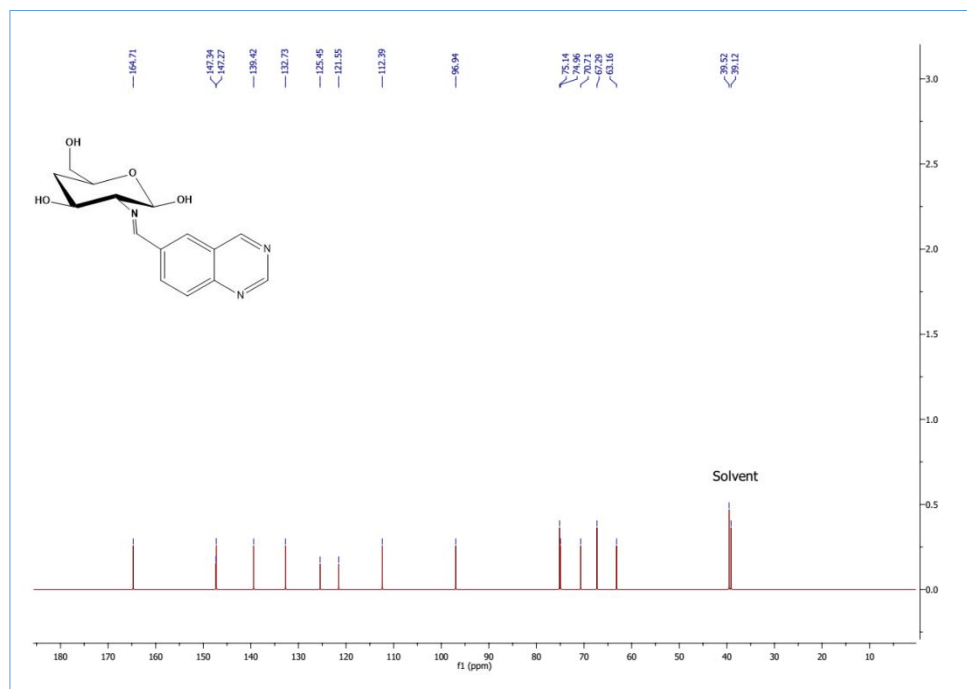

**Figure S17:**  $^{13}\text{C}$  NMR form compound CS-P2

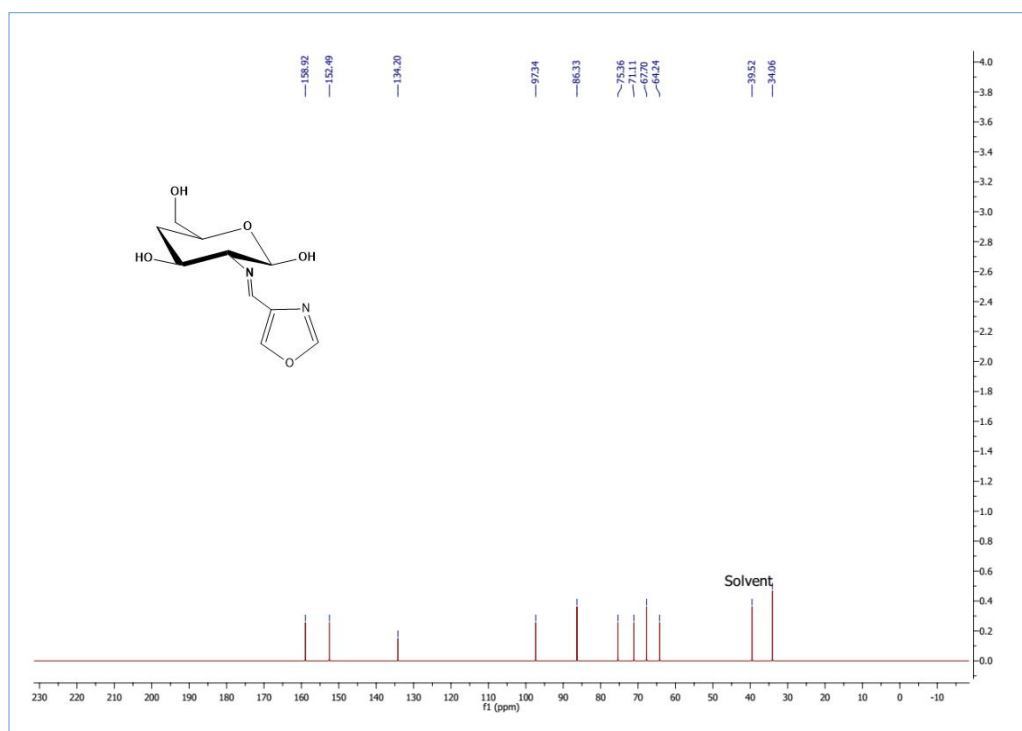

**Figure S18:**  $^{13}\text{C}$  NMR form compound CS-P3
